# Supplementary material for: A carbon foam-supported high sulfur loading composite as a self-supported cathode for flexible lithium–sulfur batteries
Source: Royal Society of Chemistry journal article supplement (doi:10.1039/c8nr07964a), 2018-01-01
Supplement: c8nr07964a1.pdf [file c8nr07964a1.pdf]

# Carbon Foam-Supported High Sulfur Loading Composite as a Self-Supported Cathode for Flexible Lithium–Sulfur Batteries

Miao Zhang,<sup>a,b</sup> Kamran Amin,<sup>b</sup> Meng Cheng,<sup>b</sup> Hongxin Yuan,<sup>b</sup> Lijuan Mao,<sup>b\*</sup> Wei Yan<sup>a\*</sup> and Zhixiang Wei<sup>b\*</sup>

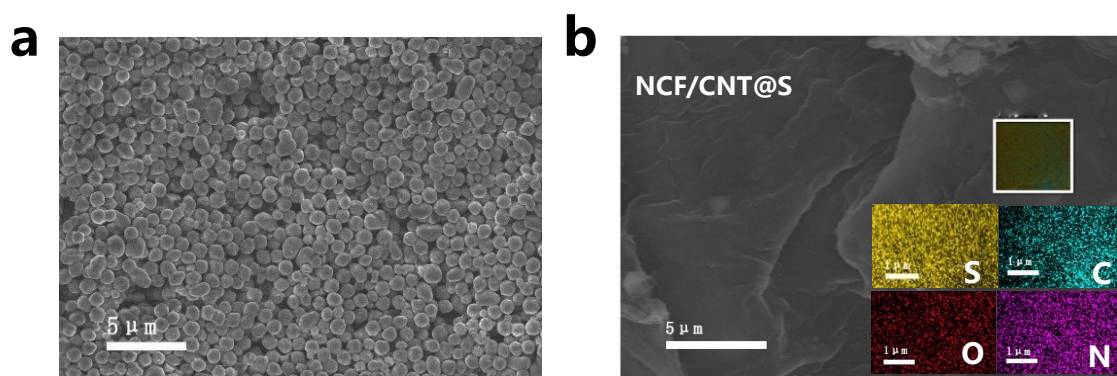

**Figure S1** (a) The SEM image of PEDOT@S. (b) The corresponding elemental mapping of sulfur, carbon, oxygen, nitrogen in NCF/CNT@S electrode.

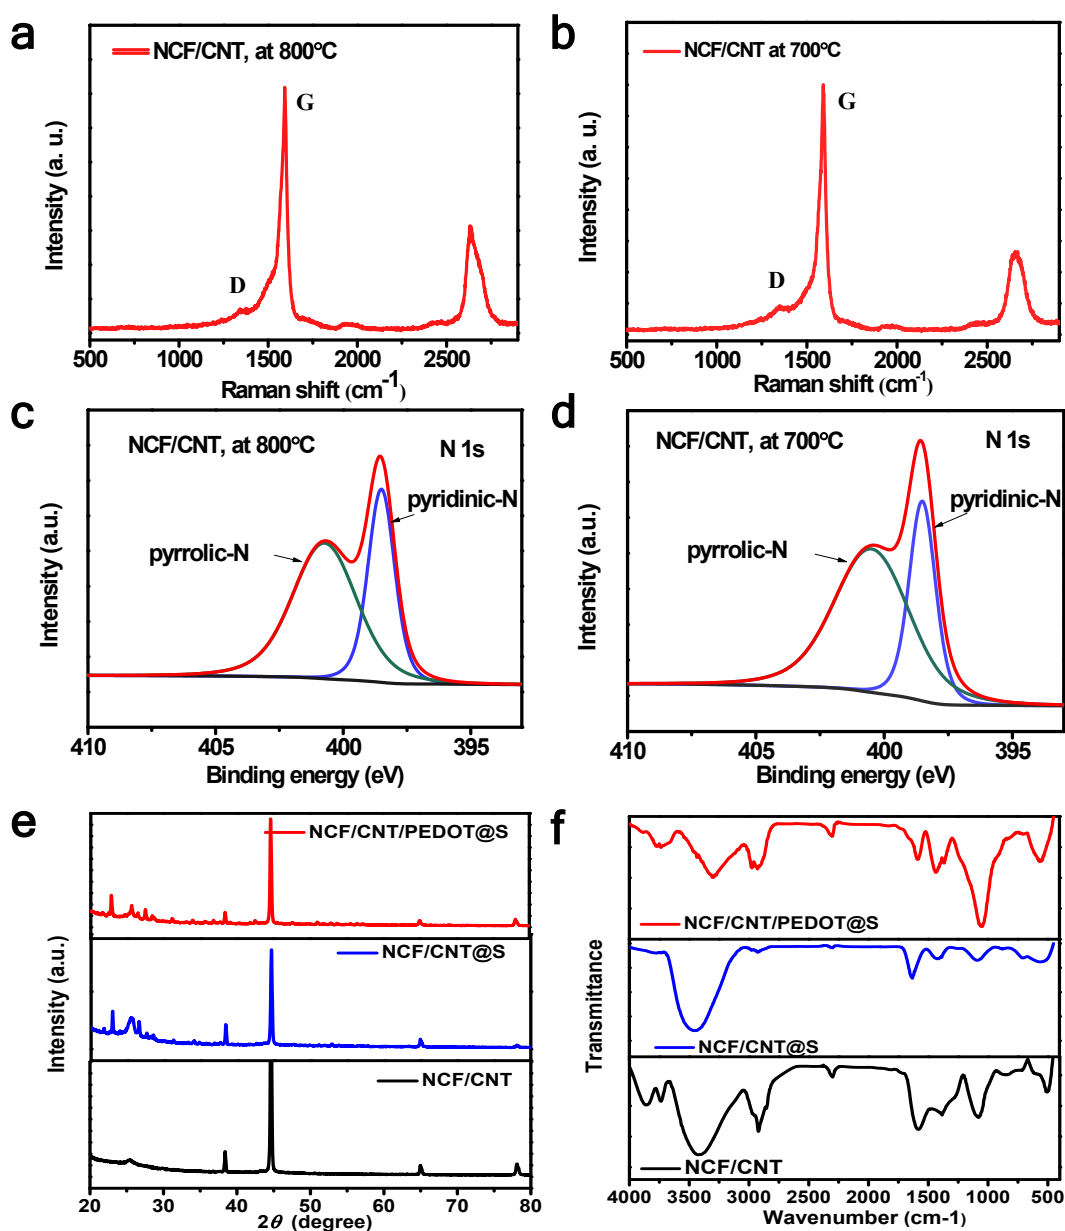

**Figure S2.** (a) and (b) Raman spectra of the NCF/CNT film prepared through pyrolysis at 800°C and 700°C. (c) and (d) XPS spectra of the NCF/CNT film prepared through pyrolysis at 800°C and 700°C. (e) X-ray diffraction (XRD) patterns of NCF/CNT/PEDOT@S, NCF/CNT@S and NCF/CNT. (f) Infrared spectrometer (FTIR) of NCF/CNT/PEDOT@S, NCF/CNT@S and NCF/CNT.

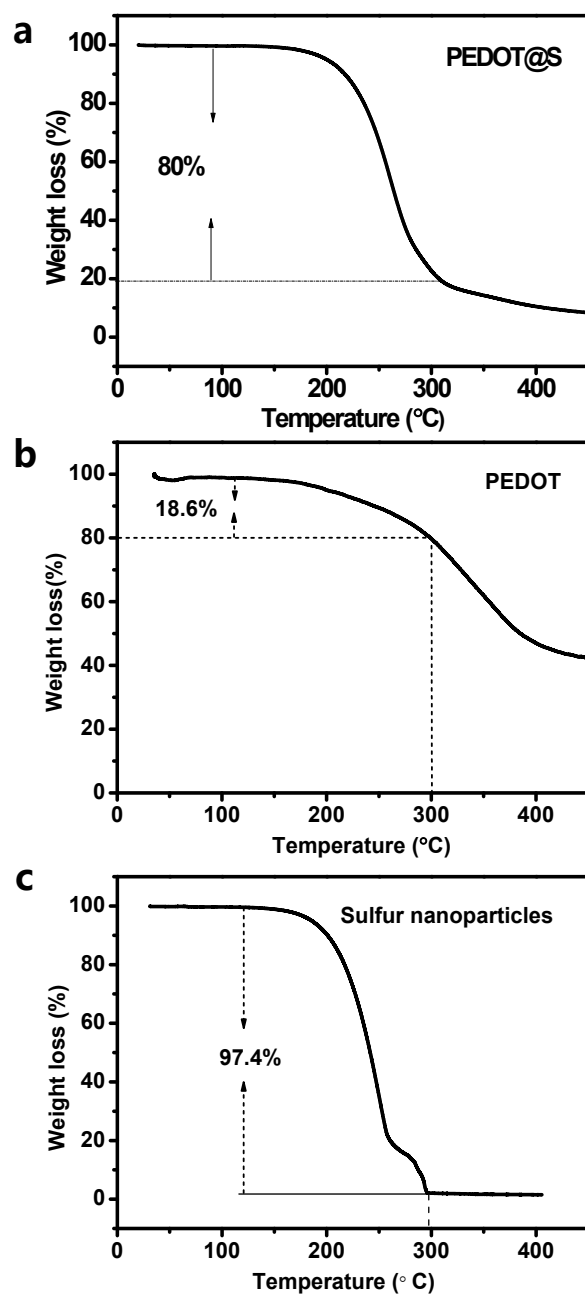

**Figure S3.** (a) TG curve of PEDOT@S. (b) TG curve of PEDOT. (c) TG curve of Sulfur nanoparticles.

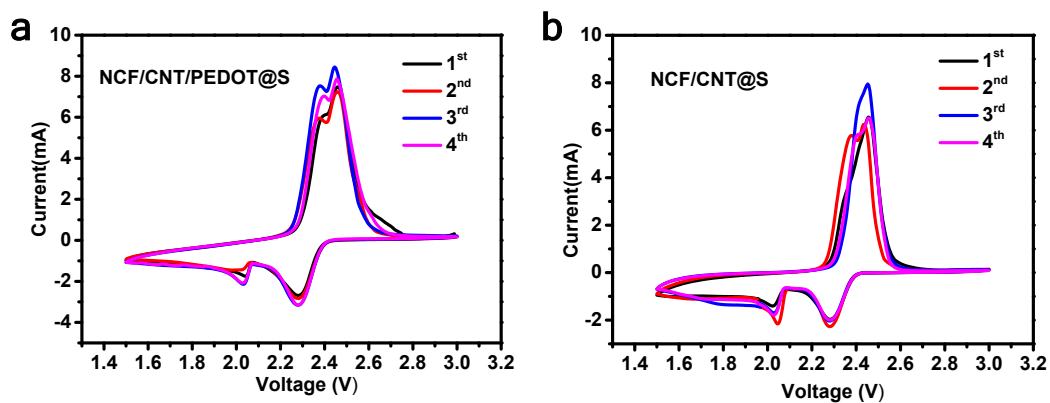

**Figure S4** (a) Cyclic voltammetry curves of the NCF/CNT/PEDOT@S and (b) NCF/CNT@S electrodes at  $0.1 \text{ mV s}^{-1}$ , 1.5–3.0 V.

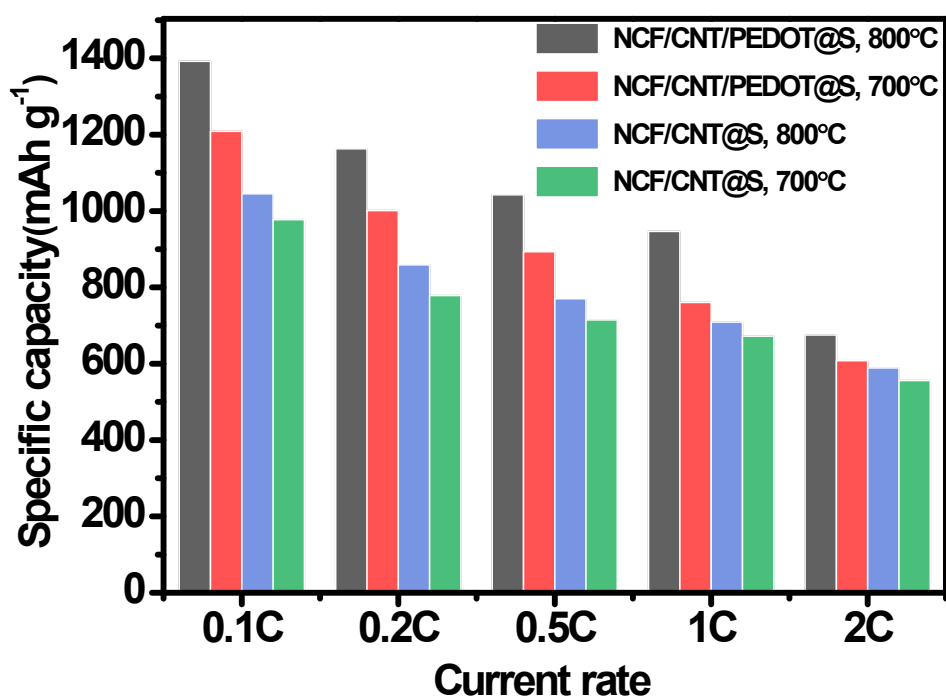

**Figure S5** Histogram of comparison rate capabilities of NCF/CNT/PEDOT@S and NCF/CNT@S electrodes prepared through pyrolysis at 700 and 800° C from 0.1 to 2C.

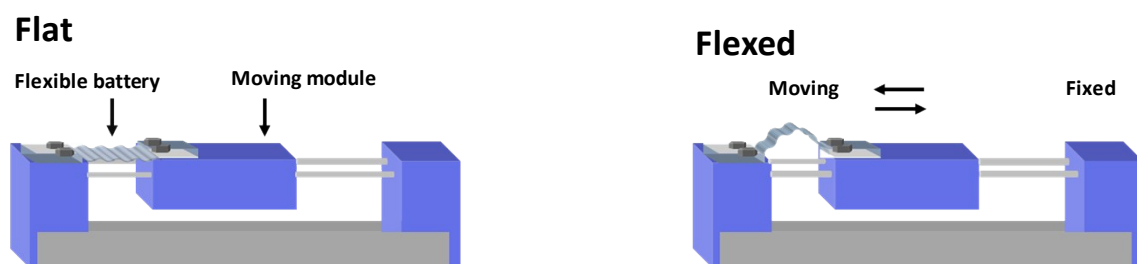

**Figure S6** The schematic of the custom-made flexing apparatus.
